# Supplementary material for: Pilot-Scale Treatment of Neutral Pharmaceuticals in Municipal Wastewater Using Reverse Osmosis and Ozonation
Source: Atypon-hosted journal article supplement (doi:10.1061/(asce)ee.1943-7870.0001777), 2020-08-18

## SUPPLEMENTAL MATERIALS

*ASCE Journal of Environmental Engineering*

# Pilot-Scale Treatment of Neutral Pharmaceuticals in Municipal Wastewater Using Reverse Osmosis and Ozonation

Jordan Hollman, Muhammad Faizan Khan, John Albino Dominic,  
and Gopal Achari

**DOI:** 10.1061/(ASCE)EE.1943-7870.0001777

© ASCE 2020

[www.ascelibrary.org](http://www.ascelibrary.org)

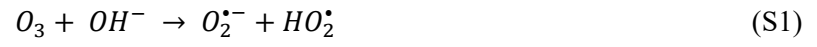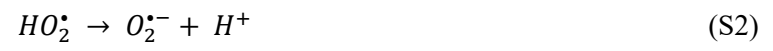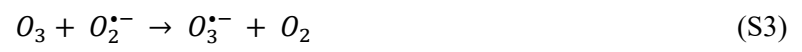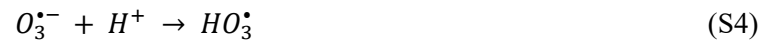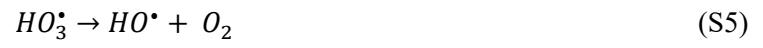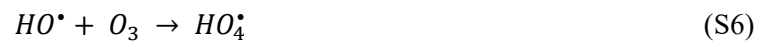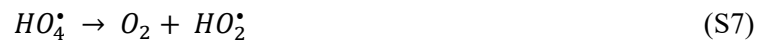

Supplement: supplemental_materials_ee.1943-7870.0001777_hollman.pdf [file supplemental_materials_ee.1943-7870.0001777_hollman.pdf]
